# Supplementary material for: Immune niches in brain metastases contain TCF1+ stem-like T cells, are associated with disease control and are modulated by preoperative SRS
Source: PubMed Central journal article supplement (PMC10055679; doi:10.21203/rs.3.rs-2722744/v1), 2023-03-23
Supplement: NIHPPrs2722744v1-supplement-1.pdf [file NIHPPrs2722744v1-supplement-1.pdf]

Supplemental Figure 1

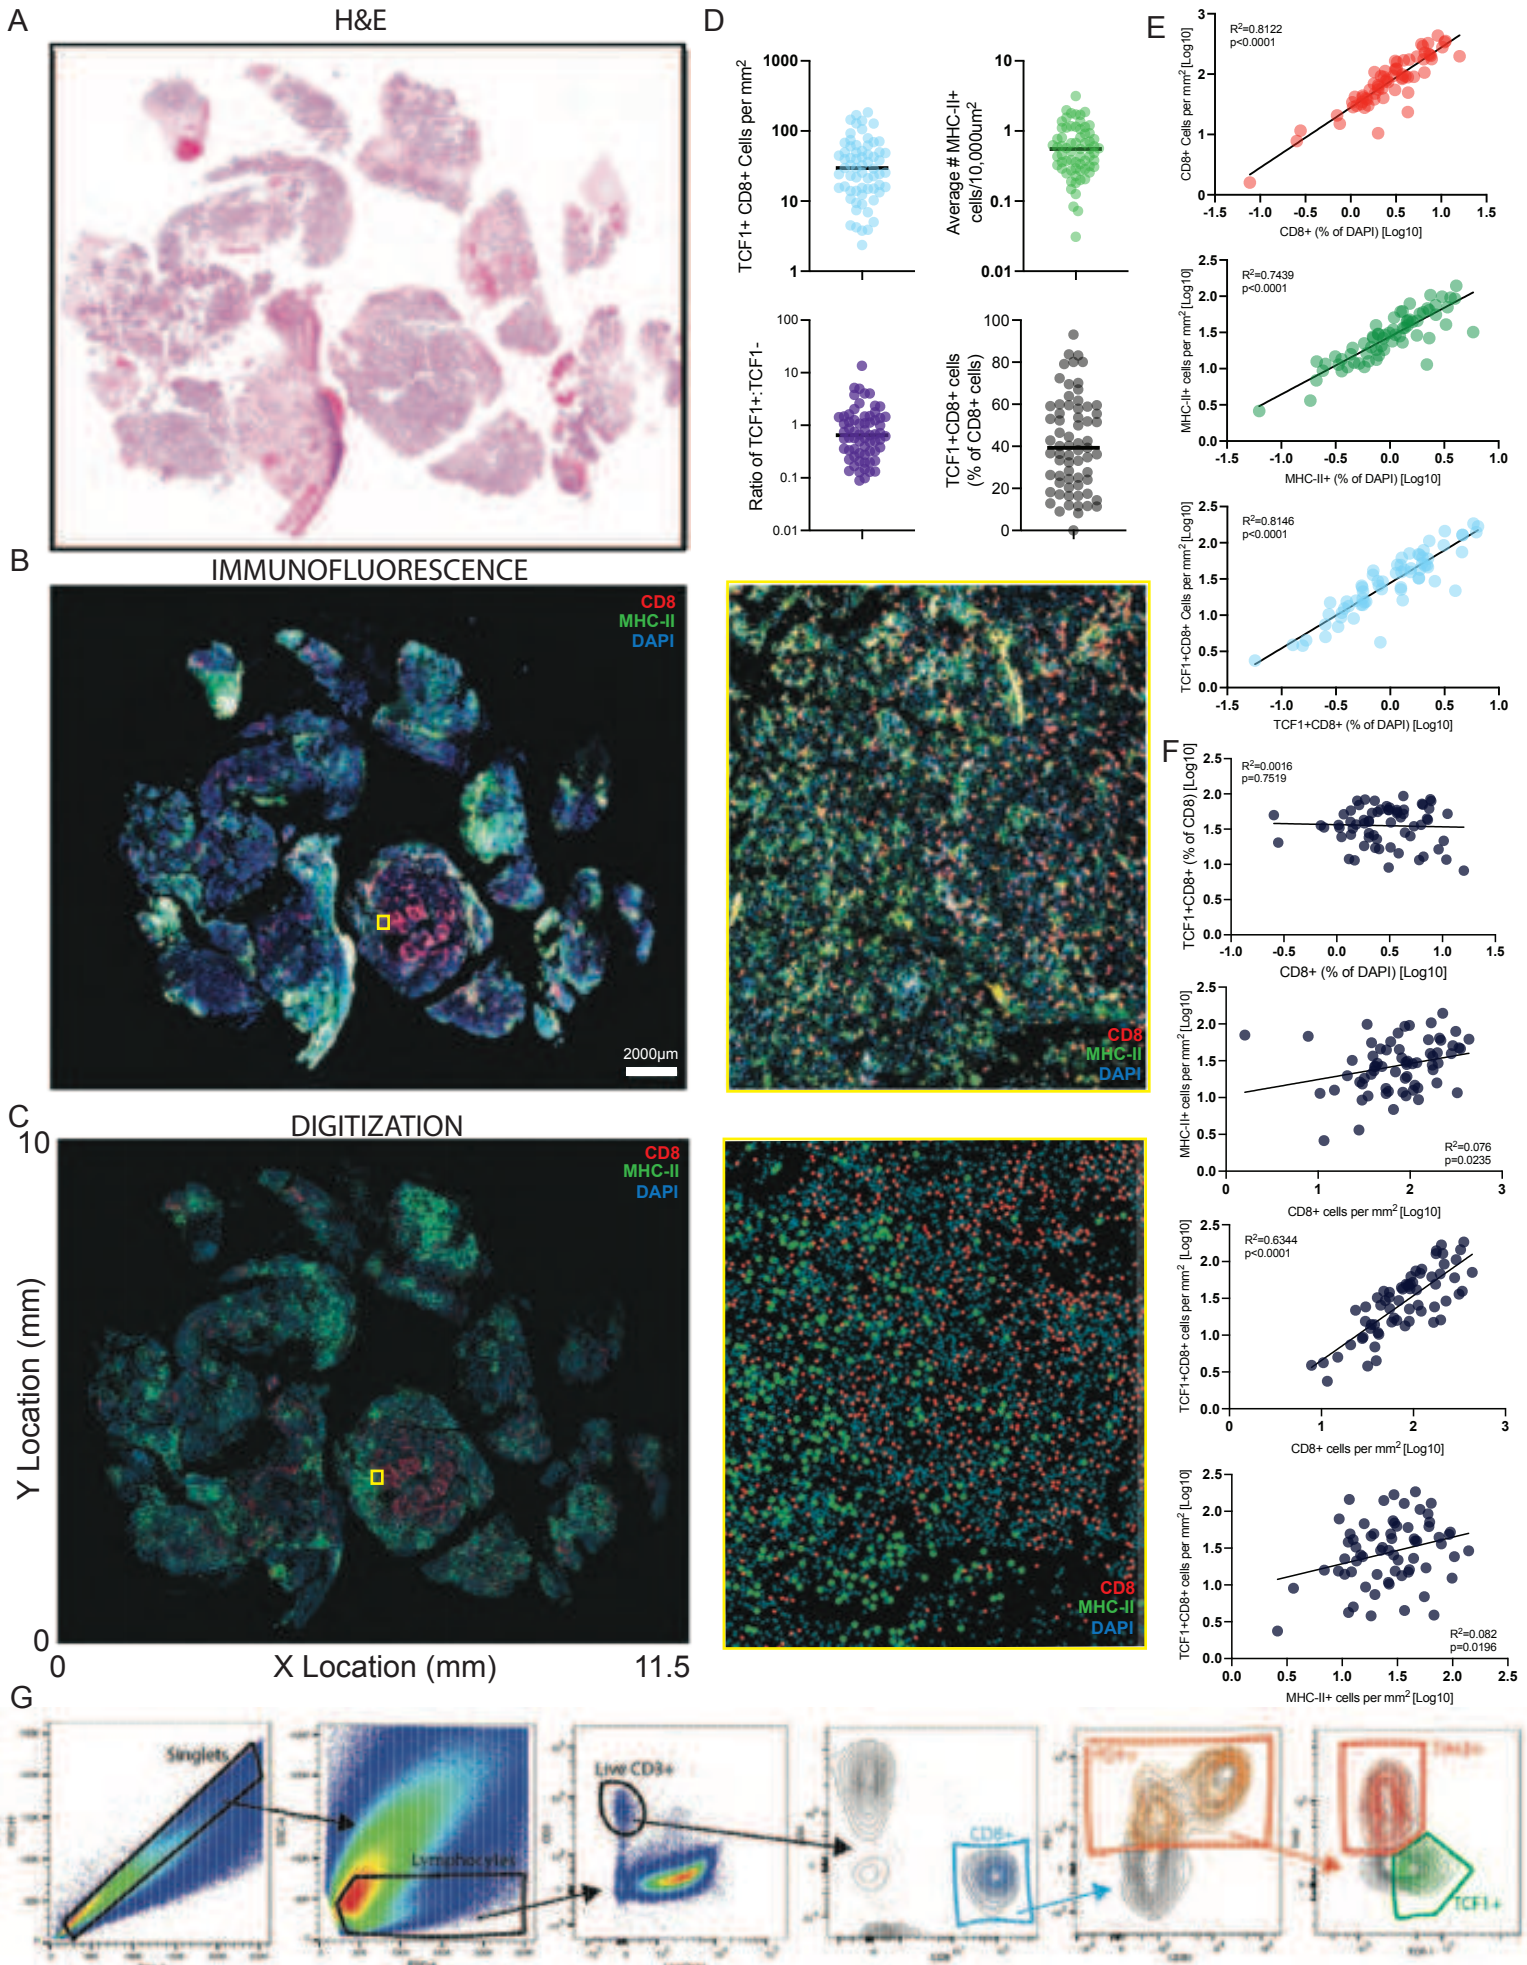

**Supplemental Figure 1.** **A)** Whole slide H&E image of BrM. **B)** Representative three-color immunofluorescence staining with region of interest shown in yellow box with region of interest on the right. **C)** Digitization of the slide with region of interest shown with region of interest on the right. **D)** Quantification of number of CD8<sup>+</sup> TCF1<sup>+</sup> cells per mm<sup>2</sup>, average number of MHC-II<sup>+</sup> cells per 10,000um<sup>2</sup>, ratio of TCF1<sup>+</sup> to TCF1<sup>-</sup> cells, and percentage of TCF1<sup>+</sup> of CD8<sup>+</sup> cells. **E)** Validation of quantification methods, demonstrating correlation between a given cell count per mm<sup>2</sup> and respective proportion of total cells. **F)** Correlation between percent CD8<sup>+</sup> of total cells and percent TCF1<sup>+</sup> of CD8<sup>+</sup> T cells, correlation between CD8<sup>+</sup> cells per mm<sup>2</sup> and MHC-II<sup>+</sup> cells per mm<sup>2</sup>, correlation between CD8 cells per mm<sup>2</sup> and TCF1<sup>+</sup> CD8<sup>+</sup> cells per mm<sup>2</sup>, correlation between MHC-II<sup>+</sup> cells per mm<sup>2</sup> and TCF1<sup>+</sup> CD8<sup>+</sup> cells per mm<sup>2</sup>. **G)** Flow cytometry gating strategy.

Supplemental Figure 2

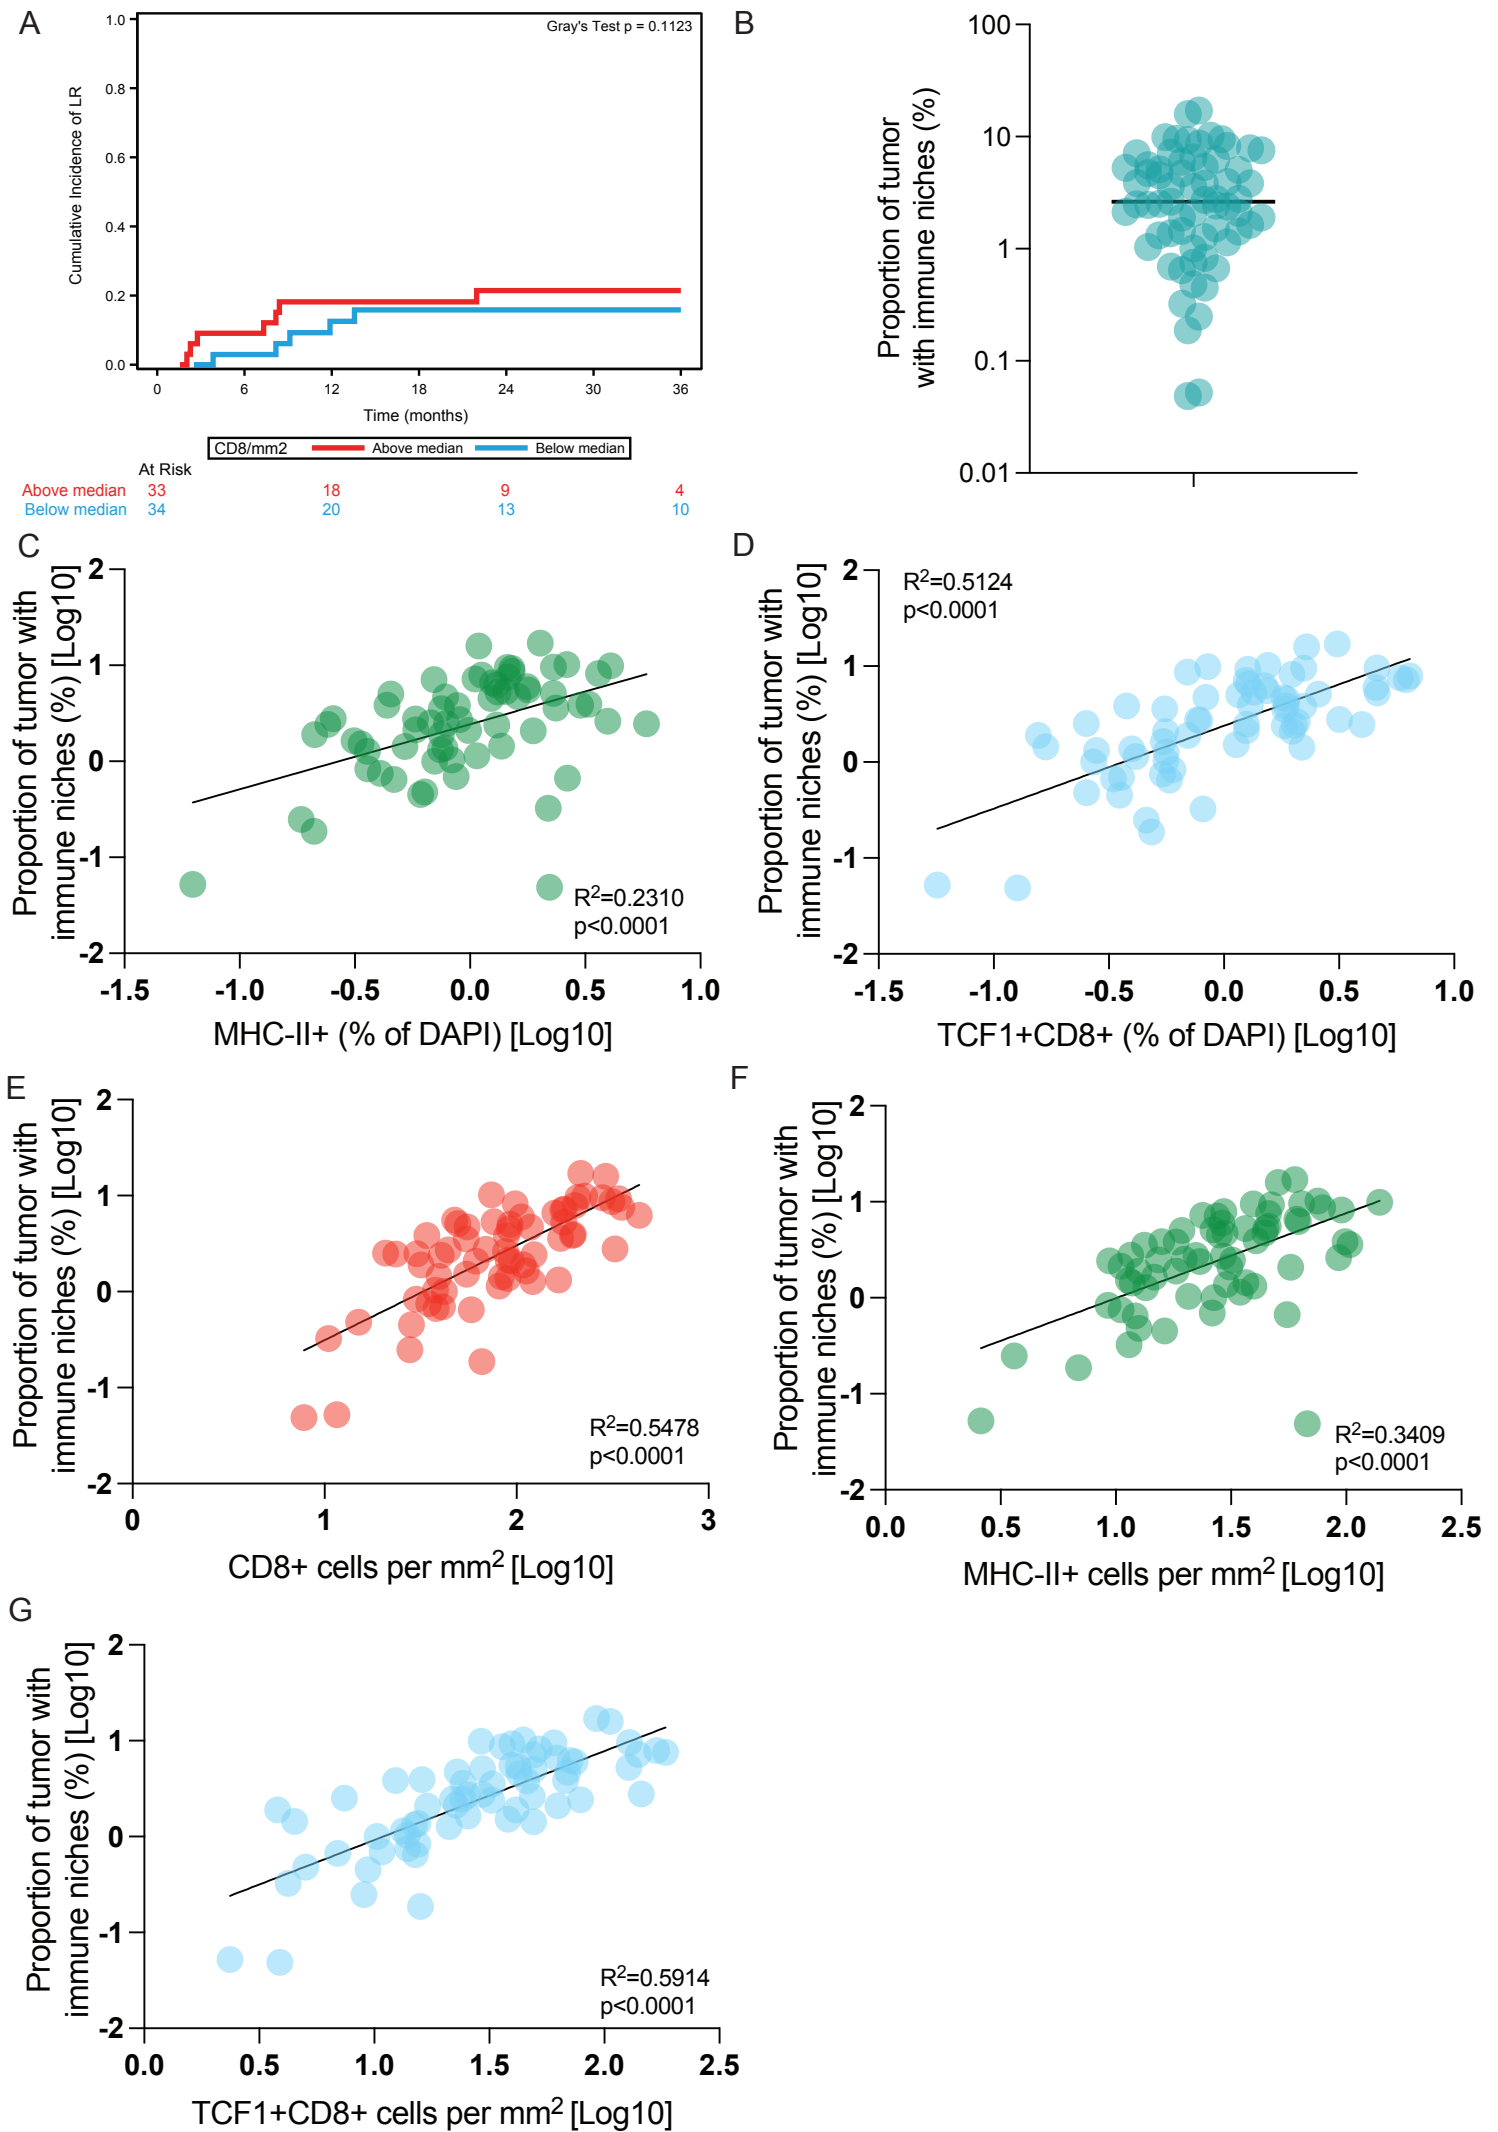

**Supplemental Figure 2. A)** No difference in local control between high vs low CD8<sup>+</sup> T cell per mm<sup>2</sup>. **B)** Quantification of the proportion of tumors occupied by immune niches (local 100um x 100um cellular neighborhoods where TCF1<sup>+</sup> CD8<sup>+</sup> T cells and MHC-II<sup>+</sup> cells co-localize). **C)** Correlation between MHC-II<sup>+</sup> cell frequency and proportion of tumors with immune niches. **D)** Correlation between TCF1<sup>+</sup> CD8<sup>+</sup> cell frequency and proportion of tumors with immune niches. **E)** Correlation between CD8<sup>+</sup> cells per mm<sup>2</sup> and proportion of tumors with immune niches. **F)** Correlation between MHC-II<sup>+</sup> cells per mm<sup>2</sup> and proportion of tumors with immune niches. **G)** Correlation between TCF1<sup>+</sup> CD8<sup>+</sup> cells per mm<sup>2</sup> and proportion of tumors with immune niches.

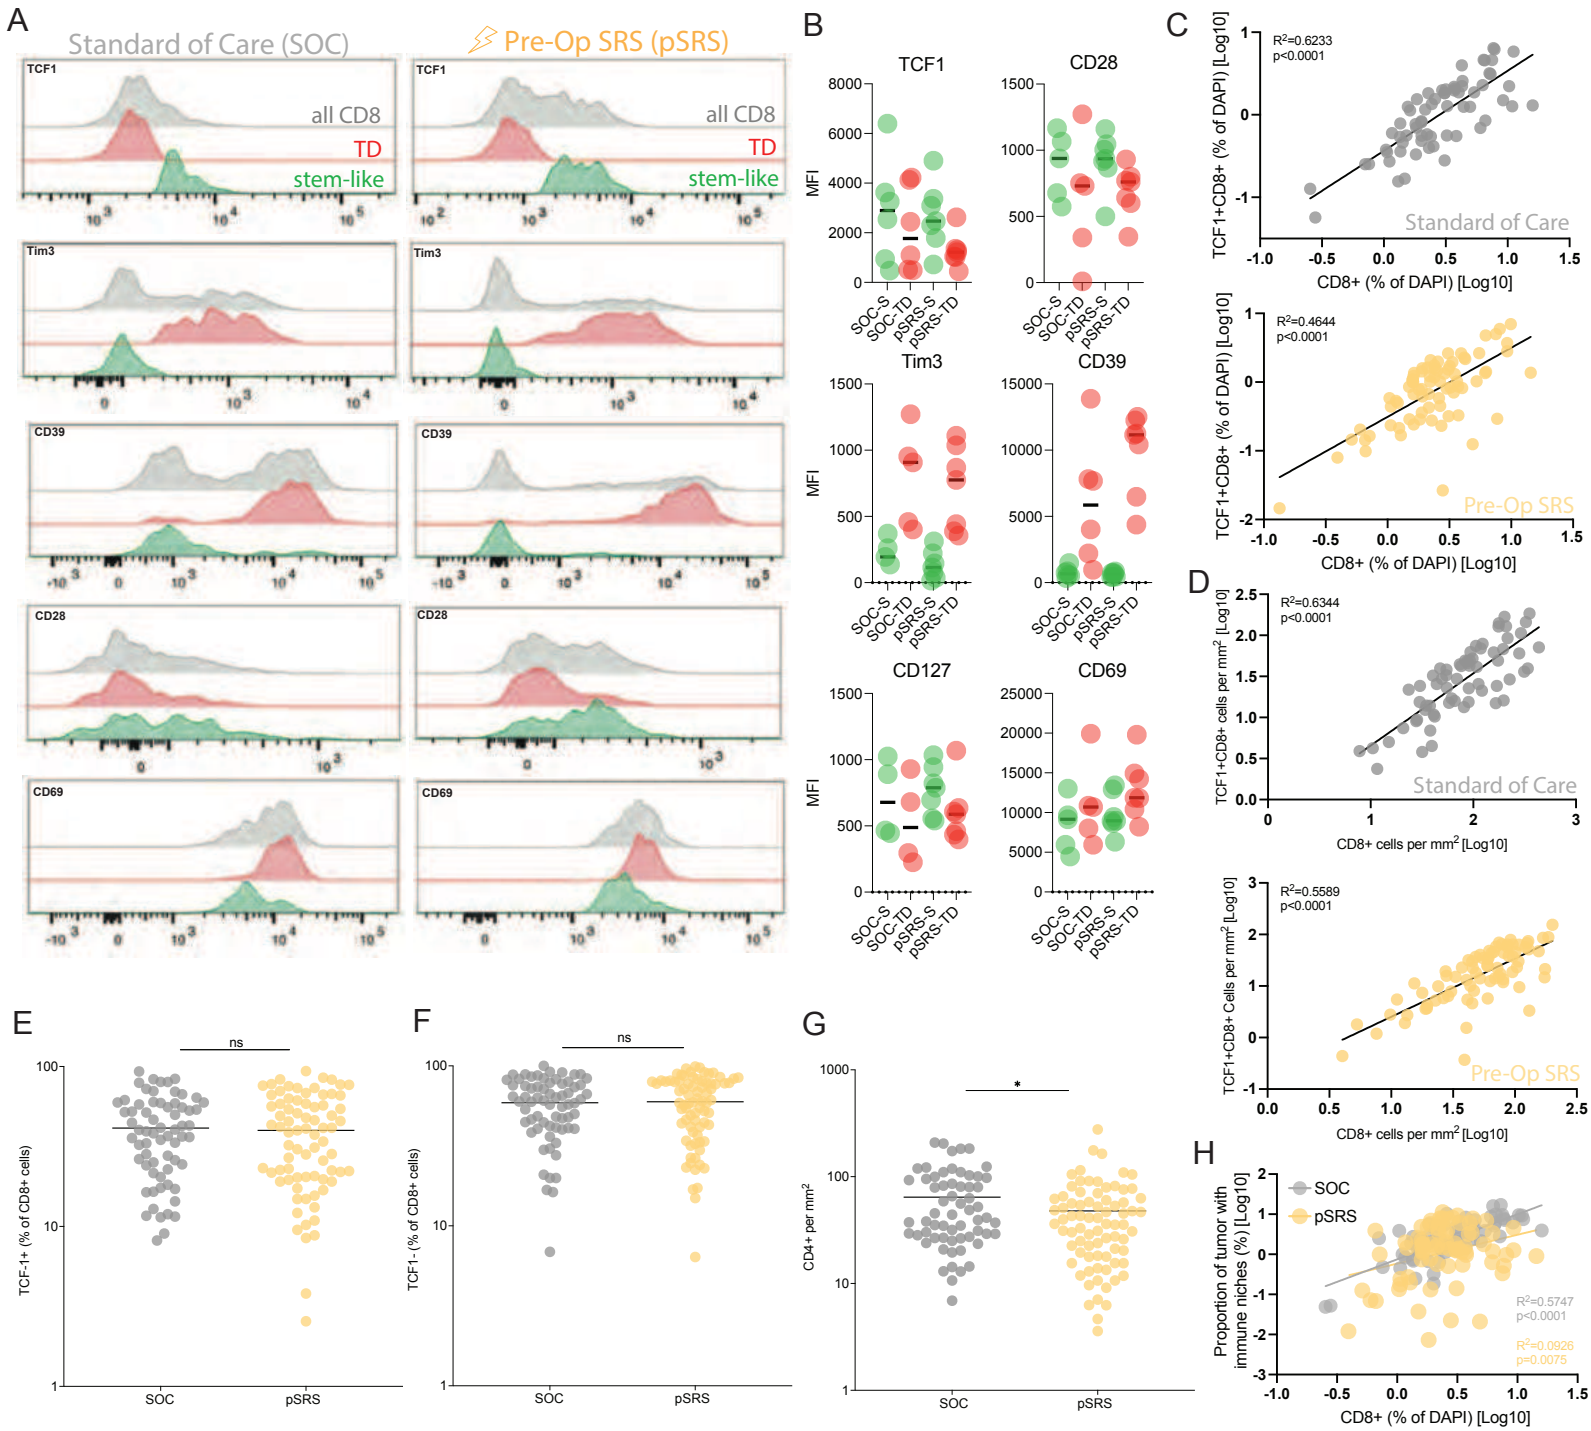

**Supplemental Figure 3.** **A)** Representative expression of stem-like and terminally differentiated effector-like cell markers in T cells from SOC and pSRS BrM by flow cytometry. **B)** Quantification of marker from (A). **C)** Correlation between frequency of CD8<sup>+</sup> cells and TCF1<sup>+</sup> CD8<sup>+</sup> cells in SOC and pSRS BrM. **D)** Correlation between numbers of CD8<sup>+</sup> cells per mm<sup>2</sup> and TCF1<sup>+</sup> CD8<sup>+</sup> cells per mm<sup>2</sup> in SOC and pSRS BrM. **E)** Concordance between frequency of TCF1<sup>+</sup> of CD8<sup>+</sup> cells in SOC and pSRS BrM, p= 0.9367. **F)** Concordance between frequency of TCF1<sup>-</sup> of CD8<sup>+</sup> cells in SOC and pSRS BrM, p= 0.8329. **G)** A significant decrease seen in CD4<sup>+</sup> cells per mm<sup>2</sup> in pSRS compared to SOC BrM, p= 0.0395. In E-G, \*:p<0.05, as calculated by unpaired t test. **H)** Correlation between frequency of CD8<sup>+</sup> and proportion of tumor with immune niches in SOC and pSRS.

Supplemental Figure 4

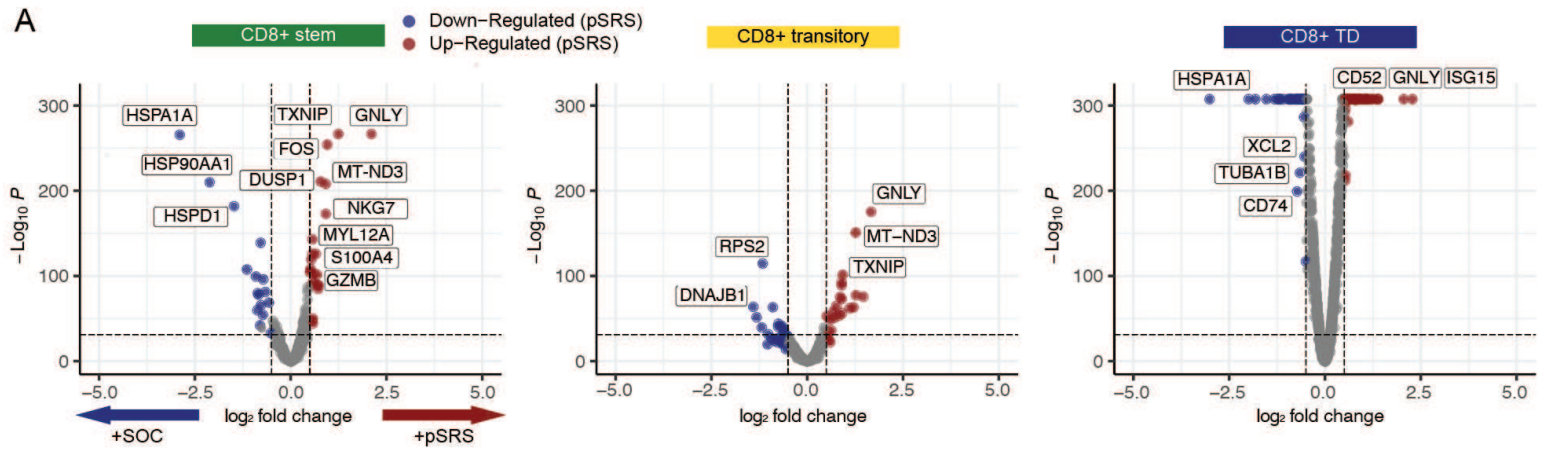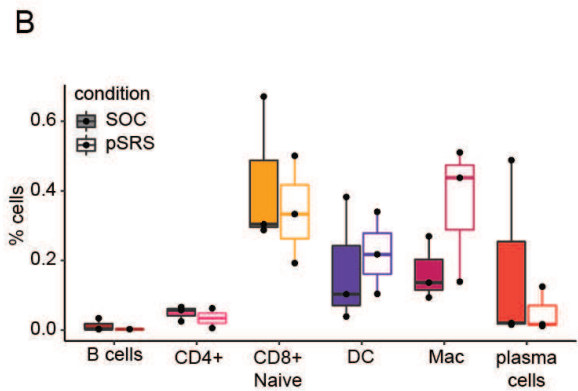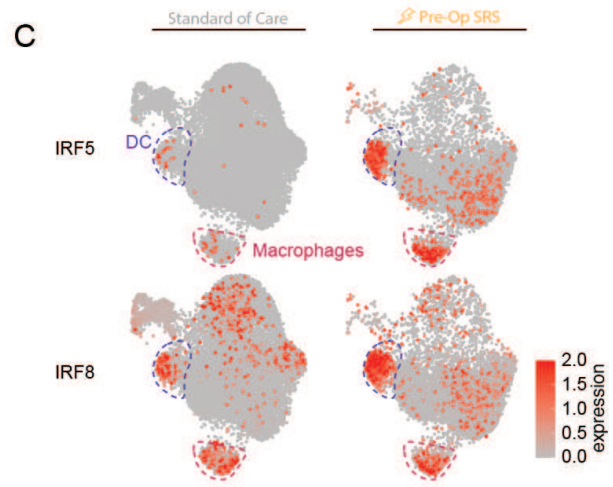

**Supplemental Figure 4. A)** Pairwise comparison of specific CD8<sup>+</sup> T cell clusters between SOC and pSRS. Volcano plots show average fold-change by all cells in the cluster by  $-\log_{10}$  p-value. The number of differentially expressed genes ( $\geq 0.25$  Log<sub>2</sub> fold-change in each pairwise comparison) are indicated in each plot. **B)** Frequencies of various infiltrating immune cells compared between SOC and pSRS. **C)** Feature plots showing increased expression of IRF5 and IRF8 in DCs and macrophages in pSRS.



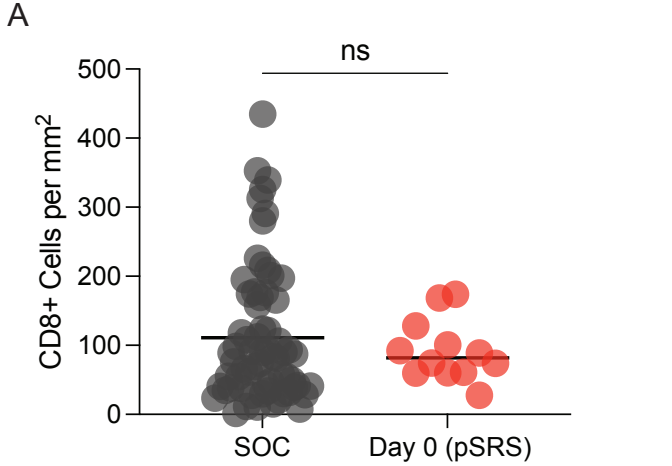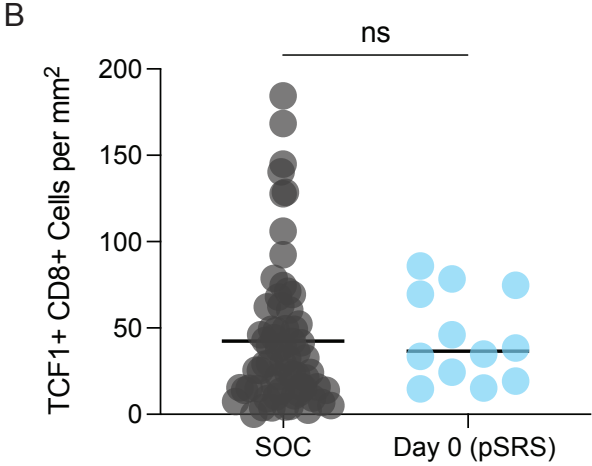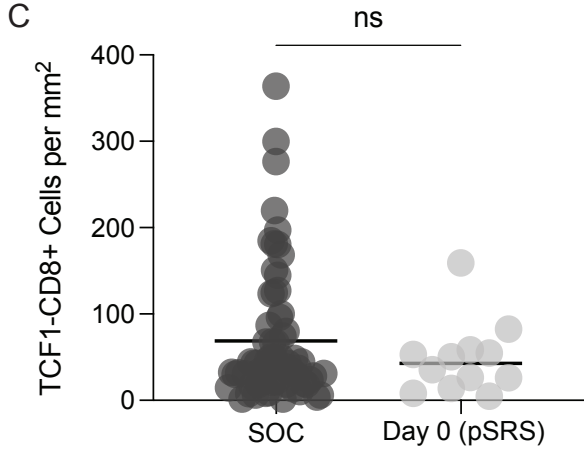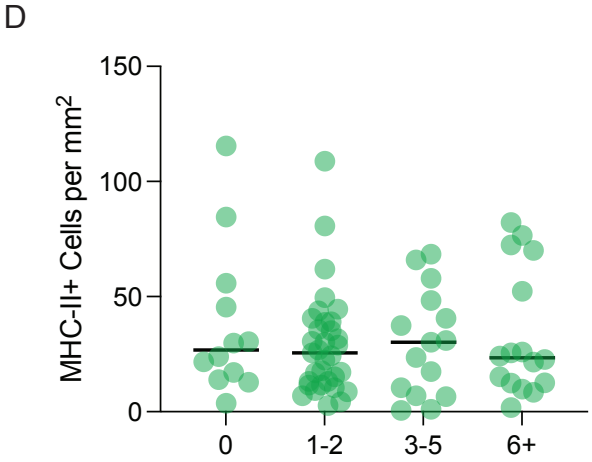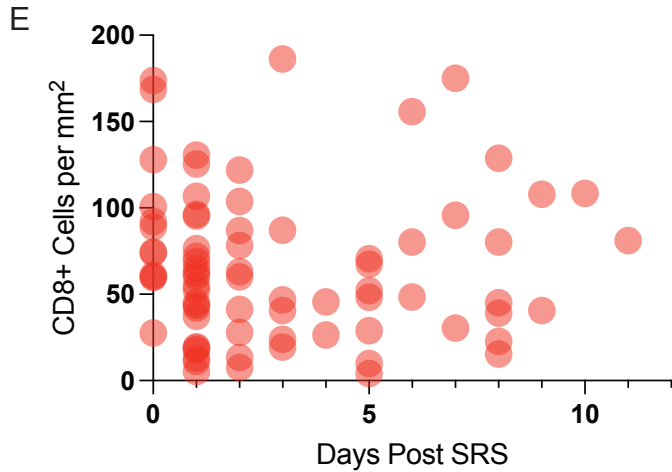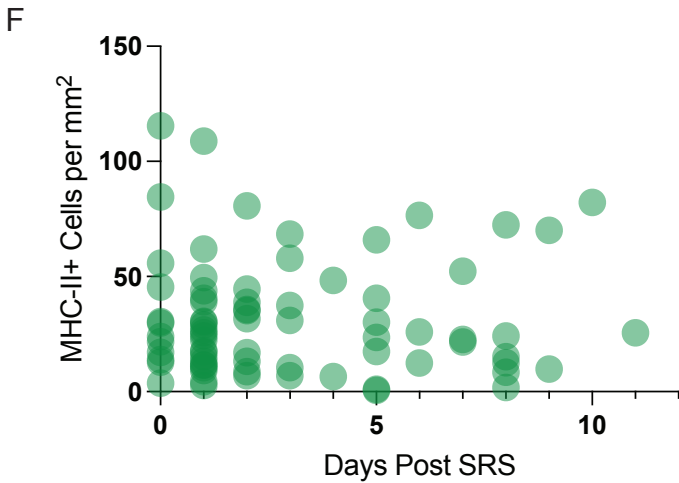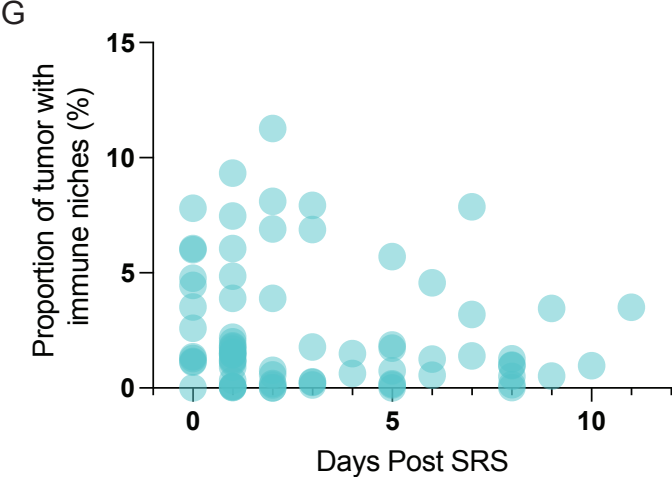

**Supplemental Figure 5.** **A)** SOC vs day 0 pSRS for CD8 per mm<sup>2</sup>. **B)** SOC vs day 0 pSRS for TCF1<sup>+</sup> per mm<sup>2</sup>. **C)** SOC vs day 0 pSRS for TCF1<sup>-</sup> per mm<sup>2</sup>. A-C calculated by unpaired t test. **D)** MHC-II<sup>+</sup> cells per mm<sup>2</sup> show no change from day 0 to day 6+ after pSRS. **E)** Distribution of CD8<sup>+</sup> cells per mm<sup>2</sup> from 0-11 days after pSRS. **F)** Distribution of MHC-II<sup>+</sup> cells per mm<sup>2</sup> from 0-11 days after pSRS. **G)** Distribution of proportion of tumor with immune niches from 0-11 days post-SRS.
